# Supplementary material
Source: PubMed Central journal article supplement (PMC2754712)

## SUPPORTING INFORMATION

### **Novel Biodegradable Poly(disulfide amine)s for Gene Delivery with High Efficiency and Low Cytotoxicity**

*Mei Ou*<sup>1</sup>, *Xu-Li Wang*<sup>2</sup>, *Rongzuo Xu*<sup>2</sup>, *Chien-Wen Chang*<sup>1</sup>, *David A. Bull*<sup>3</sup>, *Sung Wan Kim*<sup>1\*</sup>

<sup>1</sup> Center for Controlled Chemical Delivery (CCCD), Department of Pharmaceutics and Pharmaceutical Chemistry, University of Utah, Salt Lake City, Utah 84112

<sup>2</sup> Department of Pharmaceutics and Pharmaceutical Chemistry, 421 Wakara Way, Suite 318, University of Utah, Salt Lake City, Utah 84112

<sup>3</sup> Division of Cardiothoracic Surgery, Room 3C127, School of Medicine, 30N 1900E, University of Utah, Salt Lake City, Utah 84132

\* Correspondence to:

Dr. Sung Wan Kim

Center for Controlled Chemical Delivery (CCCD), Department of Pharmaceutics and Pharmaceutical Chemistry, University of Utah, Salt Lake City, Utah 84112

Phone: 801 581-6654

Fax: 801 581-7848

Email: [rburns@pharm.utah.edu](mailto:rburns@pharm.utah.edu)

## **Content**

Experiment Procedures

$^1\text{H}$  NMR & FPLC poly(CBA-DAE)

$^1\text{H}$  NMR & FPLC poly(CBA-DAB)

$^1\text{H}$  NMR & FPLC poly(CBA-DAH)

## **Experiment Procedures**

### **$^1\text{H}$ Nuclear magnetic resonance ( $^1\text{H}$ NMR)**

The  $^1\text{H}$  NMR spectra of the synthesized poly(disulfide amine)s in  $\text{D}_2\text{O}$  were recorded at 400 MHz.

### **Fast protein liquid chromatography (FPLC)**

FPLC measurements were performed using an AKTA FPLC system with a Superose 12 column, and ultraviolet and refractive index detectors. Polymers were loaded into the column as a concentration of 25 mg/mL and eluted with Tris buffer (pH 7.4), which were calibrated using a poly[*N*-(2-hydroxypropyl)-methacrylamide] (pHPMA) standards.

## $^1\text{H}$ NMR & FPLC of poly(CBA-DAE)

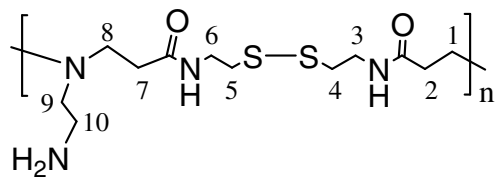

$^1\text{H}$  NMR, poly(CBA-DAE): 2.91 (NCH<sub>2</sub>CH<sub>2</sub>NH<sub>2</sub>, 2H), 2.64 (NCH<sub>2</sub>CH<sub>2</sub>NH<sub>2</sub>, 2H), 2.63 (NCH<sub>2</sub>CH<sub>2</sub>CO, 4H), 2.22 (NCH<sub>2</sub>CH<sub>2</sub>CO, 4H), 3.34 (CONHCH<sub>2</sub>CH<sub>2</sub>SS, 4H), 2.62 (CH<sub>2</sub>SSCH<sub>2</sub>, 4H)

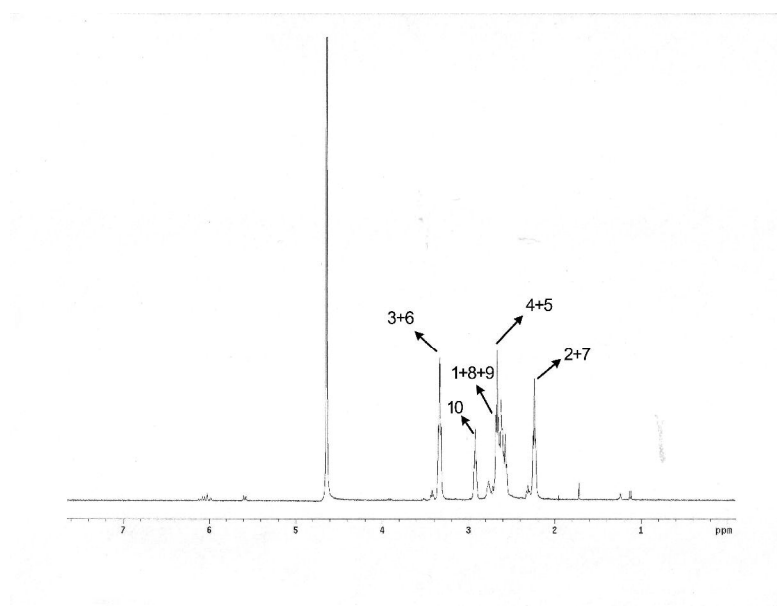

FPLC of poly(CBA-DAE) ( $M_n = 2.85$  kDa,  $M_w = 3.34$  kDa, PDI = 1.17)

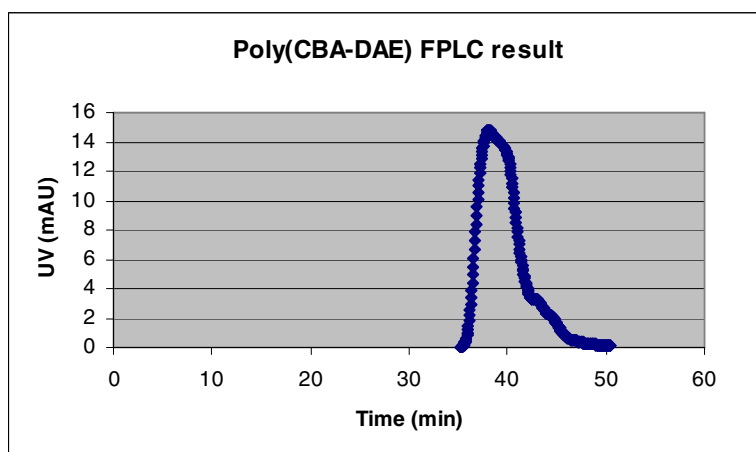

## $^1\text{H}$ NMR & FPLC of poly(CBA-DAB)

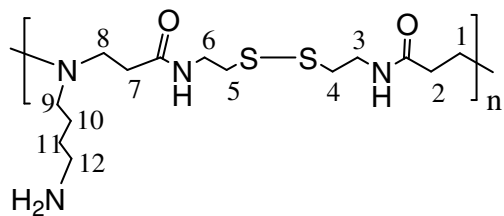

$^1\text{H}$  NMR, poly(CBA-DAB): 3.08 (NCH<sub>2</sub>CH<sub>2</sub>CH<sub>2</sub>CH<sub>2</sub>NH<sub>2</sub>, 2H), 1.58 (NCH<sub>2</sub>CH<sub>2</sub>CH<sub>2</sub>CH<sub>2</sub>NH<sub>2</sub>, 2H), 1.58 (NCH<sub>2</sub>CH<sub>2</sub>CH<sub>2</sub>CH<sub>2</sub>NH<sub>2</sub>, 2H), 2.91 (NCH<sub>2</sub>CH<sub>2</sub>CH<sub>2</sub>CH<sub>2</sub>NH<sub>2</sub>, 2H), 2.82 (NCH<sub>2</sub>CH<sub>2</sub>CO, 4H), 2.48 (NCH<sub>2</sub>CH<sub>2</sub>CO, 4H), 3.38 (CONHCH<sub>2</sub>CH<sub>2</sub>SS, 4H), 2.63 (CH<sub>2</sub>SSCH<sub>2</sub>, 4H)

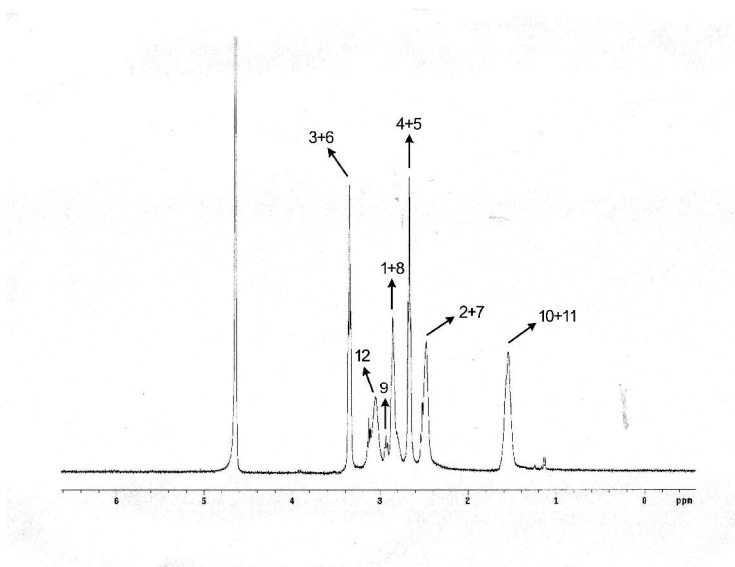

FPLC of poly(CBA-DAB) ( $M_n = 4.23$  kDa,  $M_w = 4.72$  kDa, PDI = 1.12)

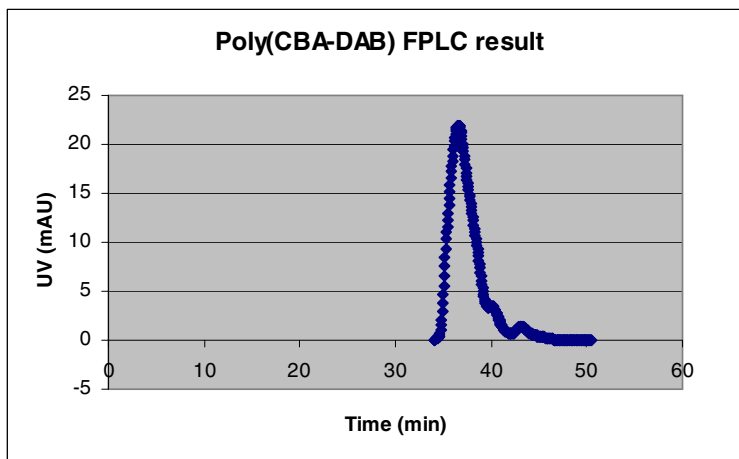

# <sup>1</sup>H NMR & FPLC of poly(CBA-DAH)

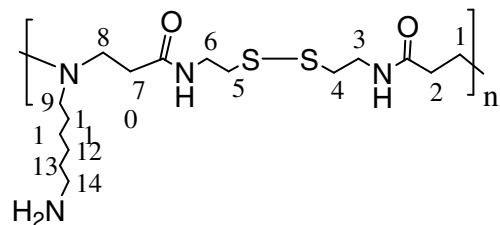

<sup>1</sup>H NMR, poly(CBA-DAH): 3.15 (NCH<sub>2</sub>CH<sub>2</sub>CH<sub>2</sub>CH<sub>2</sub>CH<sub>2</sub>CH<sub>2</sub>NH<sub>2</sub>, 2H), 1.48 (NCH<sub>2</sub>CH<sub>2</sub>CH<sub>2</sub>CH<sub>2</sub>CH<sub>2</sub>CH<sub>2</sub>NH<sub>2</sub>, 2H), 1.19 (NCH<sub>2</sub>CH<sub>2</sub>CH<sub>2</sub>CH<sub>2</sub>CH<sub>2</sub>CH<sub>2</sub>NH<sub>2</sub>, 2H), 1.19 (NCH<sub>2</sub>CH<sub>2</sub>CH<sub>2</sub>CH<sub>2</sub>CH<sub>2</sub>CH<sub>2</sub>NH<sub>2</sub>, 2H), 1.48 (NCH<sub>2</sub>CH<sub>2</sub>CH<sub>2</sub>CH<sub>2</sub>CH<sub>2</sub>CH<sub>2</sub>NH<sub>2</sub>, 2H), 2.85 (NCH<sub>2</sub>CH<sub>2</sub>CH<sub>2</sub>CH<sub>2</sub>CH<sub>2</sub>CH<sub>2</sub>NH<sub>2</sub>, 2H), 2.81 (NCH<sub>2</sub>CH<sub>2</sub>CO, 4H), 2.52 (NCH<sub>2</sub>CH<sub>2</sub>CO, 4H), 3.35 (CONHCH<sub>2</sub>CH<sub>2</sub>SS, 4H), 2.65 (CH<sub>2</sub>SSCH<sub>2</sub>, 4H)

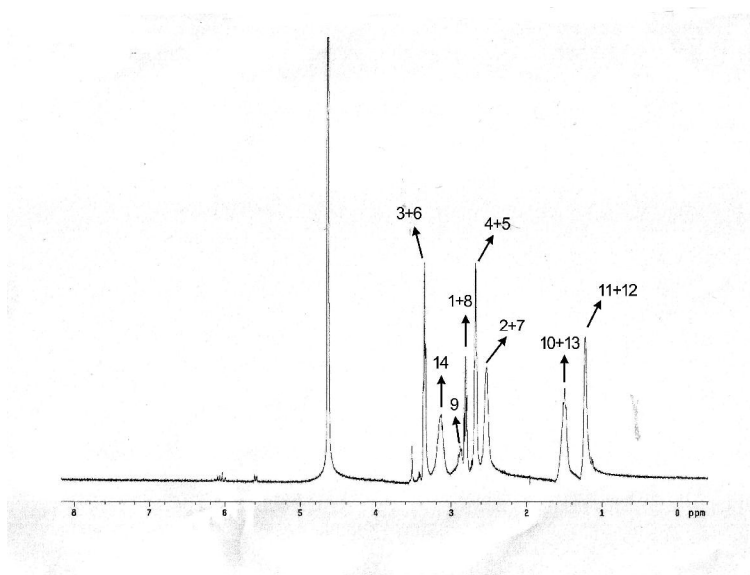

FPLC of poly(CBA-DAH) ( $M_n = 3.12$  kDa,  $M_w = 3.52$  kDa, PDI = 1.13)

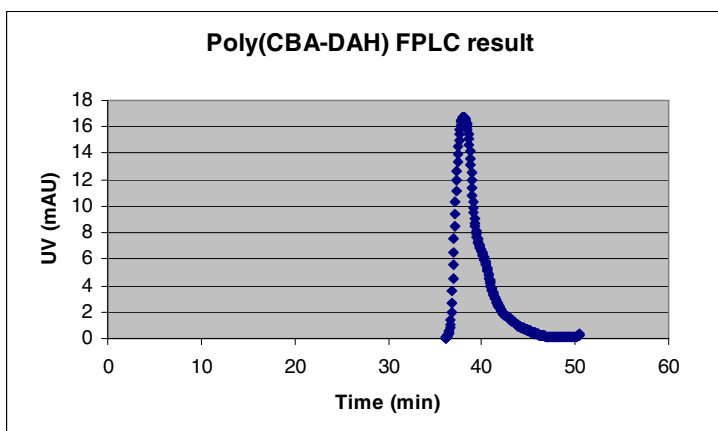

Supplement: NIHMS143708-supplement-Supporting_Info.pdf [file NIHMS143708-supplement-Supporting_Info.pdf]
